# Supplementary material
Source: PubMed Central journal article supplement (PMC4965557)
Supplement: 10.1074_M116.723767_jbc.M116.723767-1.pdf [file 10.1074_M116.723767_jbc.M116.723767-1.pdf]

**14-3-3 $\sigma$  loss leads to activation of the epithelial to mesenchymal transition due to the stabilization of c-Jun.**

**Kumarkrishna Raychaudhuri<sup>1</sup>, Neelam Chaudhary<sup>2,3</sup>, Mansa Gurjar<sup>1</sup>, Roseline D'Souza<sup>1</sup>, Jazeel Limzerwala<sup>1</sup>, Subbareddy Maddika<sup>2</sup>, Sorab N. Dalal<sup>1</sup>.**

From the <sup>1</sup>KS215, Advanced Centre for Treatment, Research and Education in Cancer (ACTREC), Tata Memorial Centre, Kharghar, Navi Mumbai, 410210, India. <sup>2</sup>Laboratory of Cell Death & Cell Survival, Centre for DNA Fingerprinting and Diagnostics (CDFD), Nampally, Hyderabad 500001, India. <sup>3</sup> Graduate studies, Manipal University, Manipal, Karnataka, 576104, India.

To whom correspondence should be addressed: Dr. S.N. Dalal. KS215, Advanced Centre for Treatment, Research and Education in Cancer (ACTREC), Tata Memorial Centre, Sector 22, Kharghar, Navi Mumbai, 410210, India. Phone number: +91-22-27405007, Fax: +91-22-2740-5058, Email: [sdalal@actrec.gov.in](mailto:sdalal@actrec.gov.in)

**Supplemental materials**

A 14-3-3 $\sigma$ <sup>+/+</sup>14-3-3 $\sigma$ <sup>-/-</sup>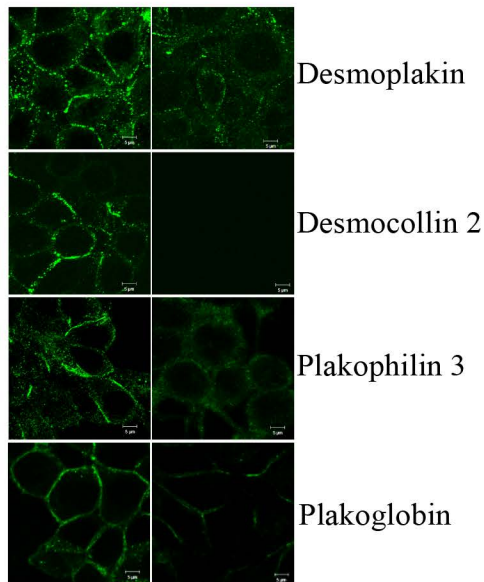

B

14-3-3 $\sigma$ <sup>+/+</sup>14-3-3 $\sigma$ <sup>-/-</sup>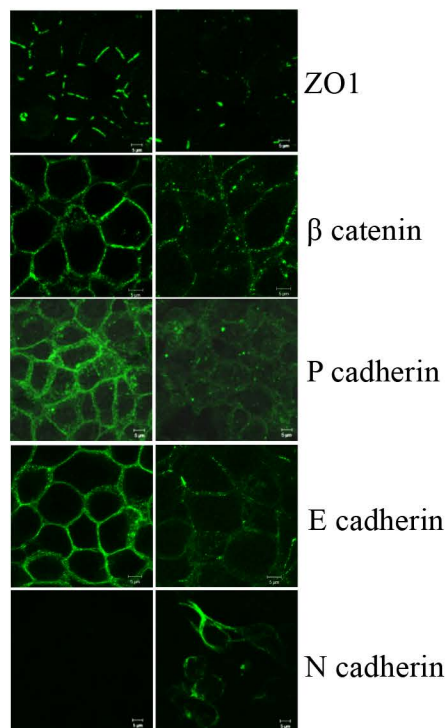

C

14-3-3 $\sigma$ <sup>+/+</sup>14-3-3 $\sigma$ <sup>-/-</sup>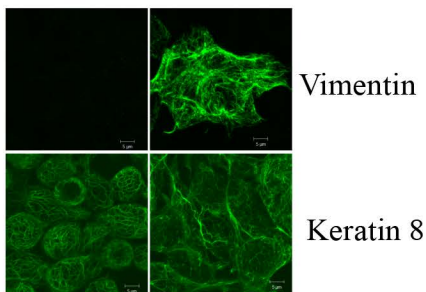

**Supplemental figure legend**

**Supplemental figure S1.** Loss of 14-3-3 $\sigma$  does not lead to change in the localization of the adhesion proteins. *A-C*, 14-3-3 $\sigma^{-/-}$  and 14-3-3 $\sigma^{+/+}$  cells were fixed and stained with the indicated antibodies followed by confocal microscopy. Micrographs for desmosomal proteins (*A*), adherens junction proteins (*B*) and intermediate filament proteins (*C*) are shown in the figure. Magnification is X63 with 2X optical zoom and bars indicate 5 $\mu$ m.

**Supplemental table 1. Oligonucleotide sequences for generation of site directed mutants of c-Jun.**

| Point mutant    | Sequence                  |
|-----------------|---------------------------|
| c JUN S58A FWD  | gcgccaagaacGCGgacctcctca  |
| c JUN S58A REV  | tgaggaggtcCGCgttcttggcgc  |
| c JUN S267A FWD | gcatcgetgccGCCaagtgccgaaa |
| c JUN S267A REV | ttcggcacttGGCggcagcgatgc  |

**Supplemental table 2. List of antibodies used for Western blot experiments along with the appropriate dilution.**

| Antibody         | Supplier                    | Dilution |
|------------------|-----------------------------|----------|
| Plakophilin3     | Zymed                       | 1:2000   |
| Desmoglein2      | Zymed                       | 1:500    |
| Desmocollin2/3   | Zymed                       | 1:500    |
| DP-200           | Abexome                     | 1:1000   |
| Plakoglobin      | Abcam                       | 1:500    |
| Vimentin         | Sigma                       | 1:5000   |
| N cadherin       | BD Biosciences              | 1:100    |
| Cytokeratin 8    | Sigma                       | 1:5000   |
| Cytokeratin 18   | Sigma                       | 1:5000   |
| Snail            | Santa Cruz                  | 1:100    |
| Slug             | Santa Cruz                  | 1:100    |
| Zeb1             | Santa Cruz                  | 1:100    |
| c-Jun            | Abcam                       | 1:100    |
| ZO1              | Zymed                       | 1:100    |
| E cadherin       | BD Biosciences              | 1:500    |
| $\beta$ catenin  | Abcam                       | 1:500    |
| Laminin A        | Abcam                       | 1:2000   |
| $\alpha$ tubulin | Abcam                       | 1:1500   |
| Flag             | Sigma                       | 1:2000   |
| GST              | Sigma                       | 1:1000   |
| Ubiquitin        | Millipore                   | 1:1000   |
| anti-Myc         | Santa Cruz                  | 1:2000   |
| $\beta$ -actin   | Sigma                       | 1:5000   |
| 14-3-3 $\sigma$  | Hybridoma supernatant CS112 | 1:10     |
| HA               | 12CA5 hybridoma supernatant | 1:10     |

**Supplemental table 3. Oligonucleotide sequences for quantitative real time PCR.**

| Gene               | Sequence               |
|--------------------|------------------------|
| E cadherin 5'      | GCAGGTCTCCTCTTGGCTCTG  |
| E cadherin 3'      | TGTGCCCACTTTGAATCGG    |
| Desmoplakin I 5'   | GCTGATTAATGATTTACAG    |
| Desmoplakin I 3'   | CACCAGAAGGCTCTCTCTTTC  |
| Desmoplakin II 5'  | AAGGTTGAGGGTTCTACTGC   |
| Desmoplakin II 3'  | TTGTCTTGCTCCAGGACTT    |
| Desmocollin 2 5'   | GTTTTACTCAGCCCCGTCTTG  |
| Desmocollin 2 3'   | GCCCATCTTCTTCTTGTCGT   |
| Desmoglein 2 5'    | TACGCCCTGCTGCTTCTCC    |
| Desmoglein 2 3'    | TCTCCCTCCC GAAGAGCCACG |
| ZO1 5'             | CAAGAGCACAGCAATGGAGGA  |
| ZO1 3'             | TCCCCACTCTGAAAATGAGGA  |
| $\beta$ catenin 5' | AGTGCTGAAGGTGCTATCTGT  |
| $\beta$ catenin 3' | GAACAAGAGTCCCAAGGAGAC  |
| Plakoglobin 5'     | CTACGGCAACCAGGAGAGC    |
| Plakoglobin 3'     | GGGACACACGGATAGCACCT   |
| Slug RT5'          | AGACCCCA TGCCA TTGAAG  |
| Slug RT3'          | GGCCAGCCCAGAAAAAGTTG   |
| Snail RT5'         | TAGCGAGTGGTCTTCTGCG    |
| Snail RT3'         | AGGGCTGCTGGAAGGTAAAC   |
| Twist 1 RT5'       | AGCTGAGCAAGATTCAGACCC  |
| Twist 1 RT3'       | GCAGCTTGCCATCTTGGAGT   |
| Zeb 1 RT5'         | AGGA TGACCTGCCAACAGAC  |
| Zeb 1 RT3'         | CTTCAGGCCCCAGGATTTCTT  |
